# Supplementary material for: Reinforcement of a BiVO4 anode with an Fe2O3 underlayer for photoelectrochemical water splitting
Source: Royal Society of Chemistry journal article supplement (doi:10.1039/d1se00310k), 2021-01-01
Supplement: d1se00310k1.pdf [file d1se00310k1.pdf]

*Supplementary information for*

**Reinforcement of a BiVO<sub>4</sub> anode by an Fe<sub>2</sub>O<sub>3</sub> underlayer for  
photoelectrochemical water splitting**

SocMan Ho-Kimura<sup>a\*</sup> and Wenjun Luo<sup>b</sup>

*<sup>a</sup>Institute of Applied Physics and Materials Engineering, University of Macau, Avenida da Universidade,  
Taipa, Macau SAR, China. Email: socmanho@um.edu.mo*

*<sup>b</sup>College of Engineering and Applied Sciences, Nanjing University, Nanjing 210093, China*

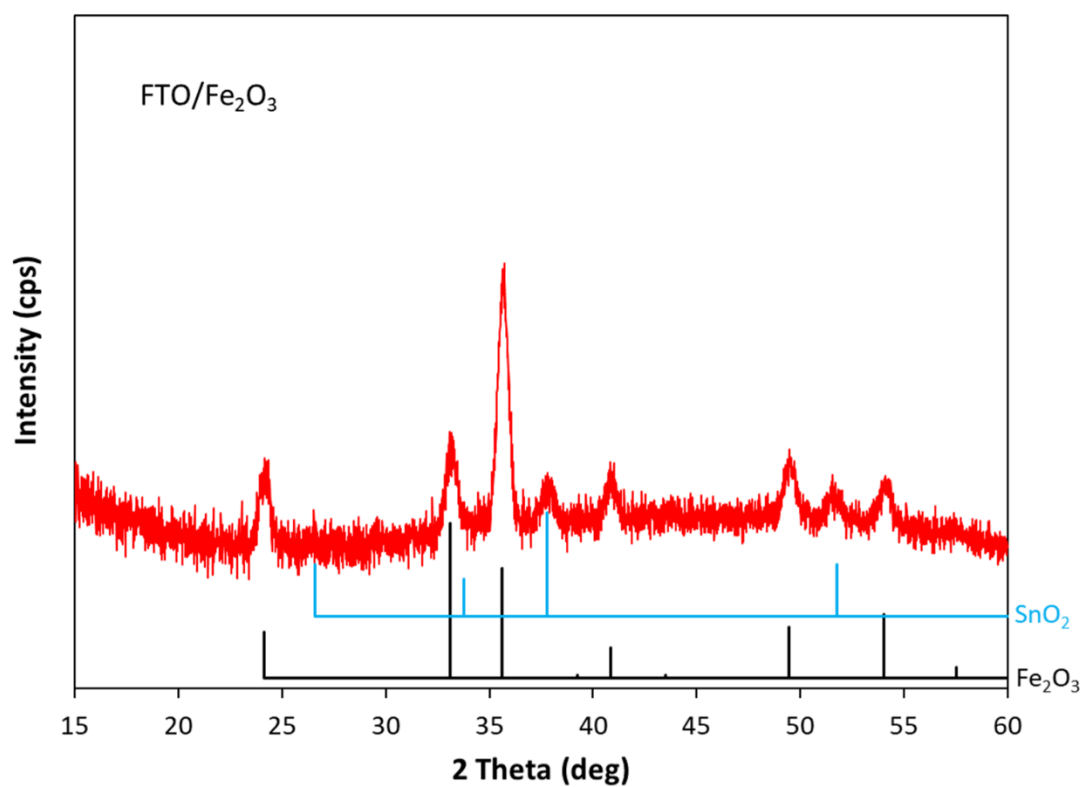

Fig. S1. XRD patterns of FTO/Fe<sub>2</sub>O<sub>3</sub>, reference  $\alpha$ -hematite (JCPDS No. 01-076-8403), and reference tin oxide (JCPDS No. 00-046-1088). Data collected using a Rigaku (SmartLab) X-ray diffractometer. X-ray incident angle at 1° with Cu K $\alpha$ 1 (using 45 kV and 200 mA,  $\lambda = 1.540619$  Å) radiation.

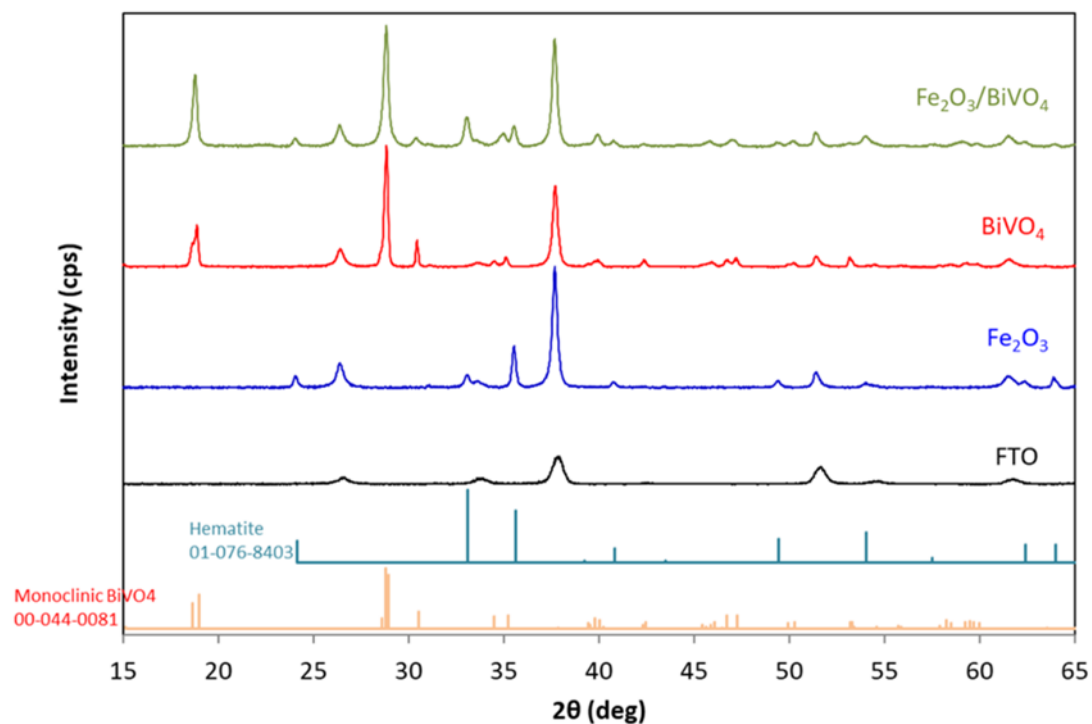

Fig. S2. XRD patterns (from top to bottom) of FTO/Fe<sub>2</sub>O<sub>3</sub>/BiVO<sub>4</sub>, FTO/BiVO<sub>4</sub>, FTO/Fe<sub>2</sub>O<sub>3</sub>, FTO substrate, reference  $\alpha$ -hematite (JCPDS No. 01-076-8403), and reference scheelite-structured monoclinic BiVO<sub>4</sub> (JCPDS No. 00-044-0081). Data collected using a Rigaku (MiniFlex 600) X-ray diffractometer.

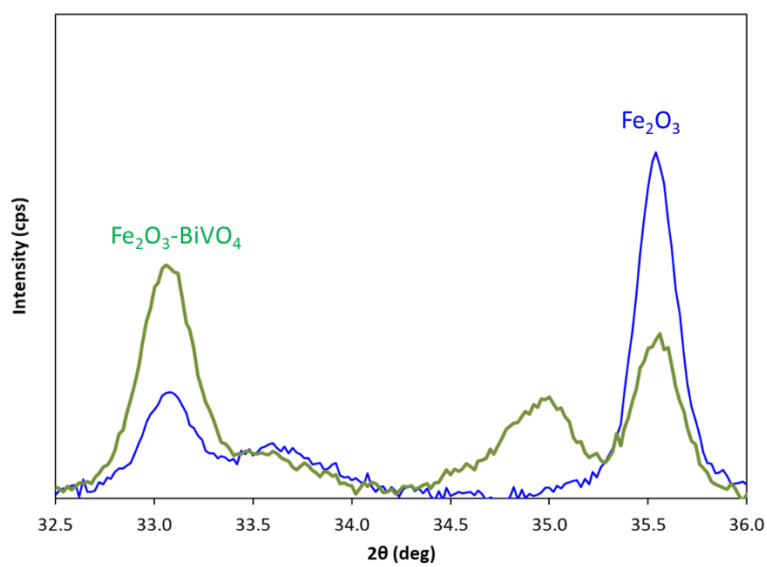

Fig. S3. Partially enlarged XRD patterns of the FTO/ $\text{Fe}_2\text{O}_3$  film (blue line) and the FTO/ $\text{Fe}_2\text{O}_3$ / $\text{BiVO}_4$  film (green line).

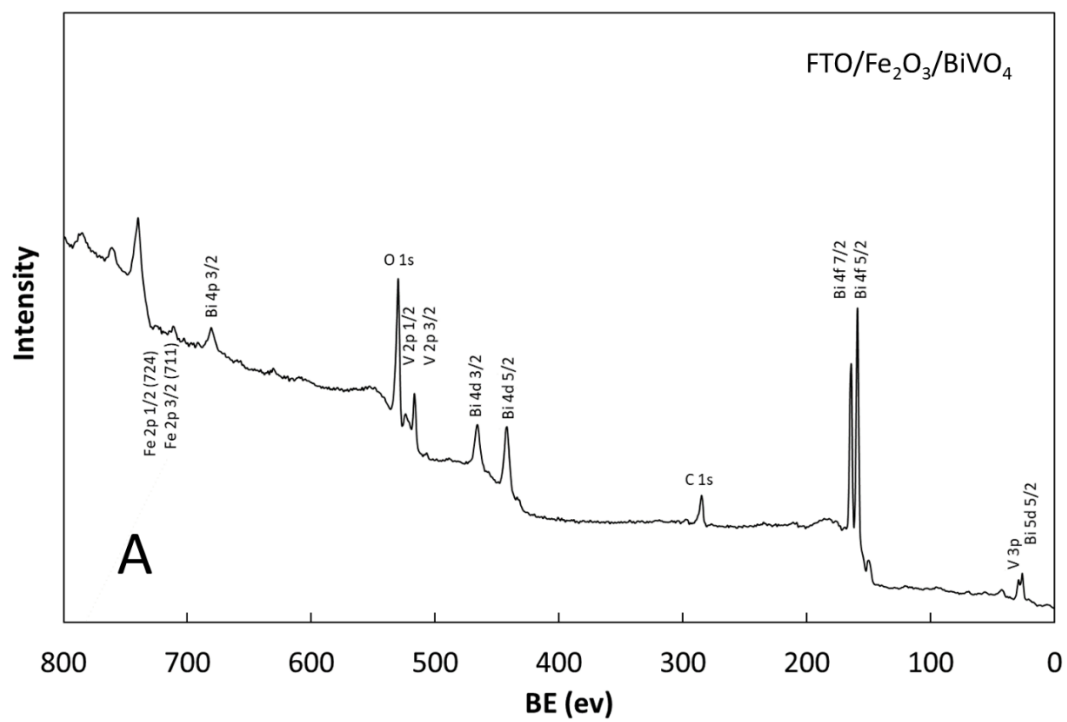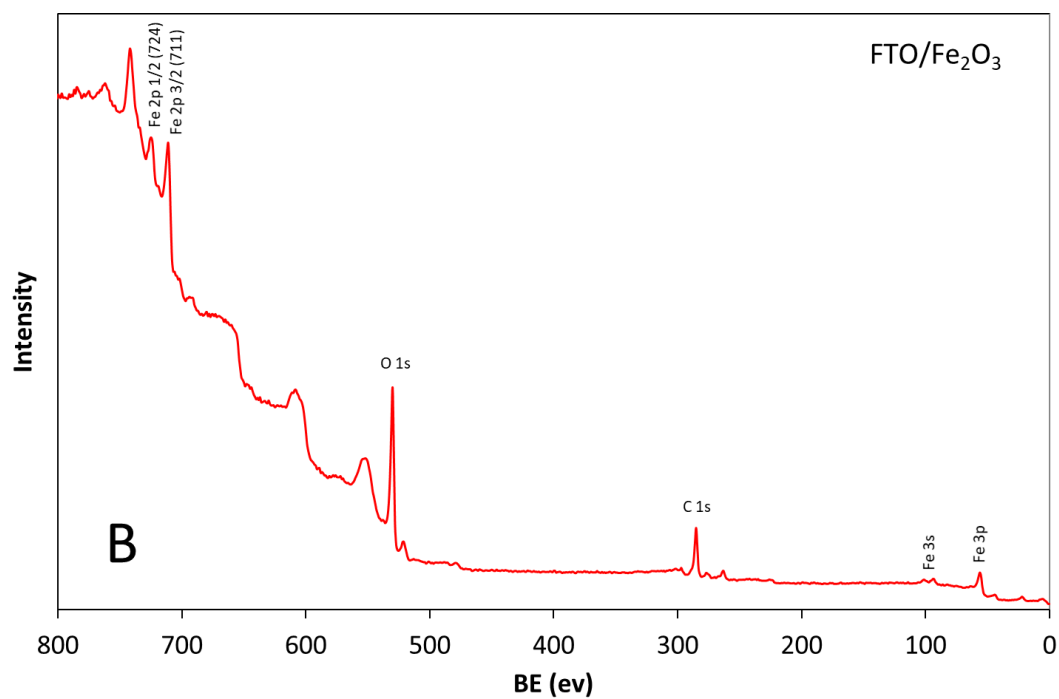

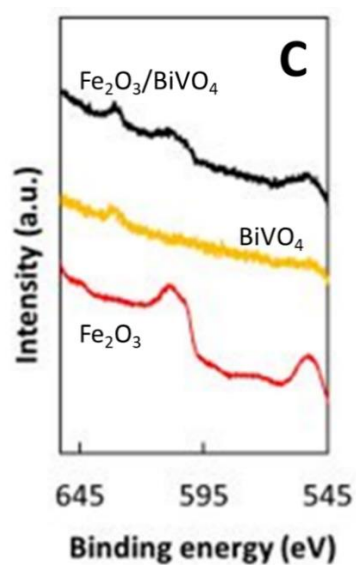

Fig. S4. X-ray photoelectron spectroscopy (XPS) spectra of (A) FTO/ $\text{Fe}_2\text{O}_3/\text{BiVO}_4$  film and (B) FTO/ $\text{Fe}_2\text{O}_3$  film. (C) the figure shows the XPS analysis of the LMM ( $\text{Mg K}\alpha$ ) peaks of  $\text{Fe}_2\text{O}_3$ . XPS data were collected using a JEOL (JPS-9010MC) X-ray photoelectron spectrometer under ultrahigh vacuum using a monochromatic  $\text{Mg K}\alpha$  X-ray source, with 25 scans for each element. The adventitious carbon 1s peak was calibrated to 284.5 eV and used as an internal standard to compensate for any charging effects.

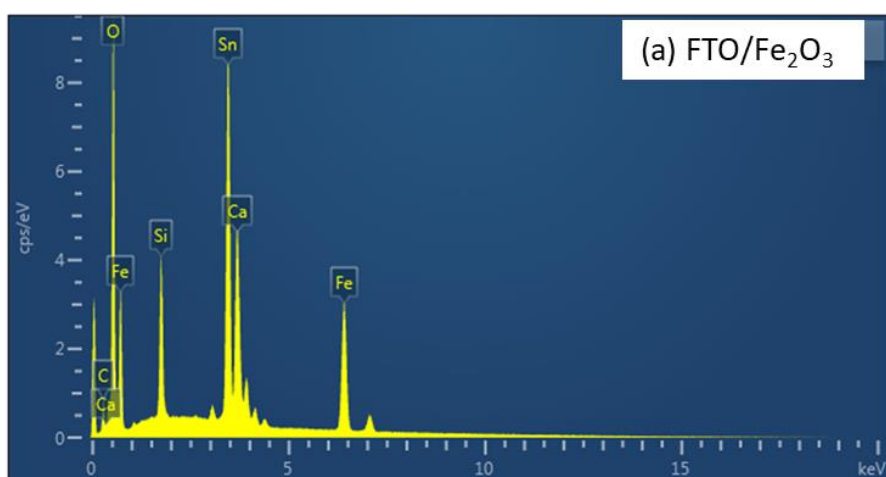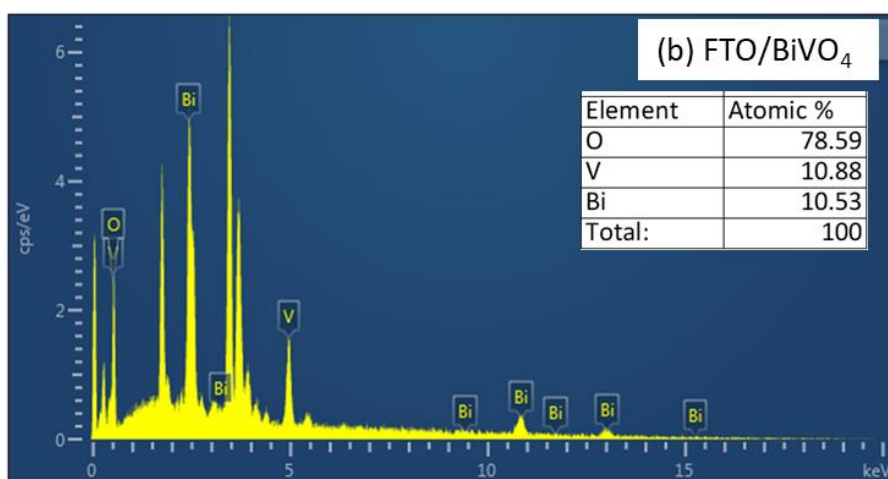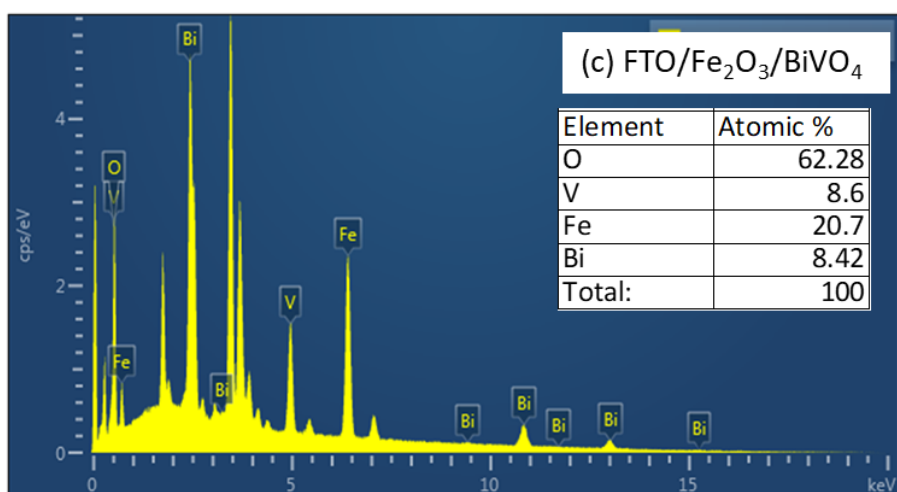

Fig. S5. The energy dispersive X-ray spectroscopy (EDS) elemental spectra of (a) FTO/Fe<sub>2</sub>O<sub>3</sub> film, (b) FTO/BiVO<sub>4</sub> film, and (c) FTO/Fe<sub>2</sub>O<sub>3</sub>/BiVO<sub>4</sub> film.

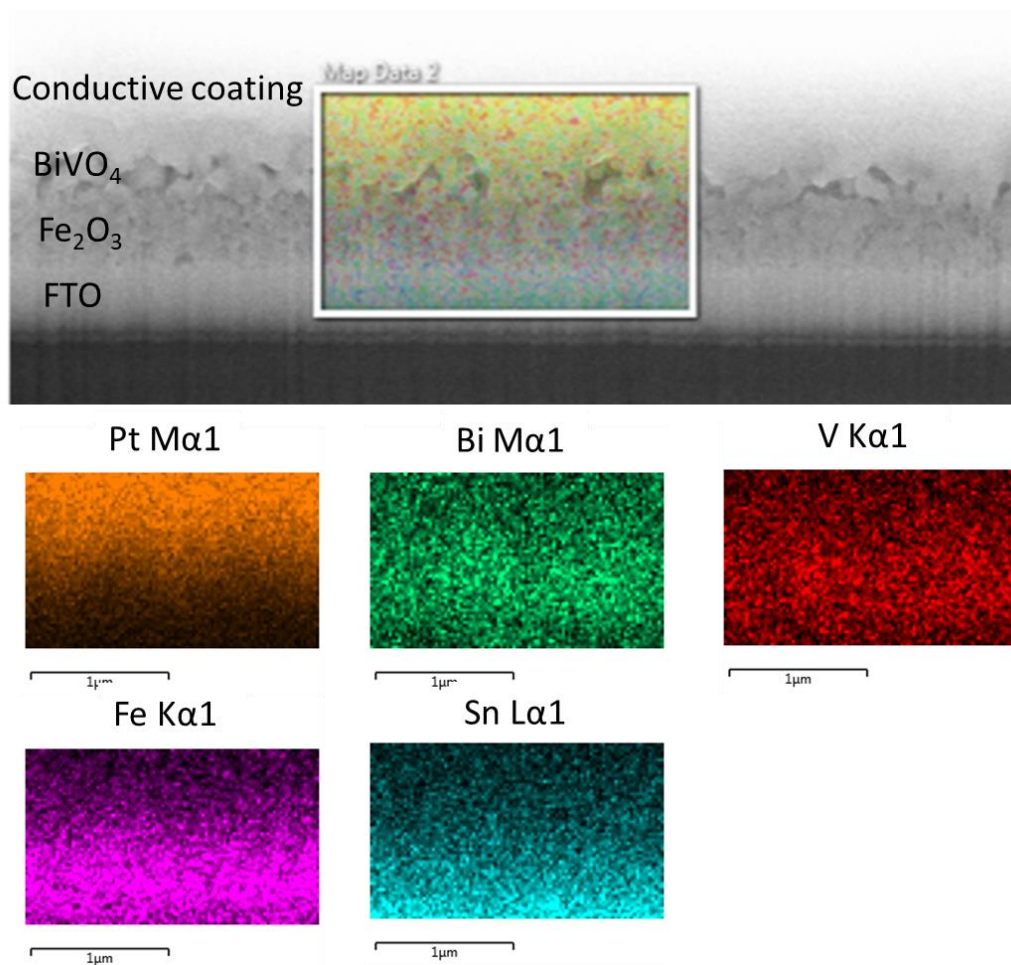

Fig. S6. EDS mapping of cross-sectional image of the FTO/Fe<sub>2</sub>O<sub>3</sub>/BiVO<sub>4</sub> film. EDS elemental analysis using an FIB-SEM. Platinum (Pt) is the conductive coating for the FIB-SEM measurement.



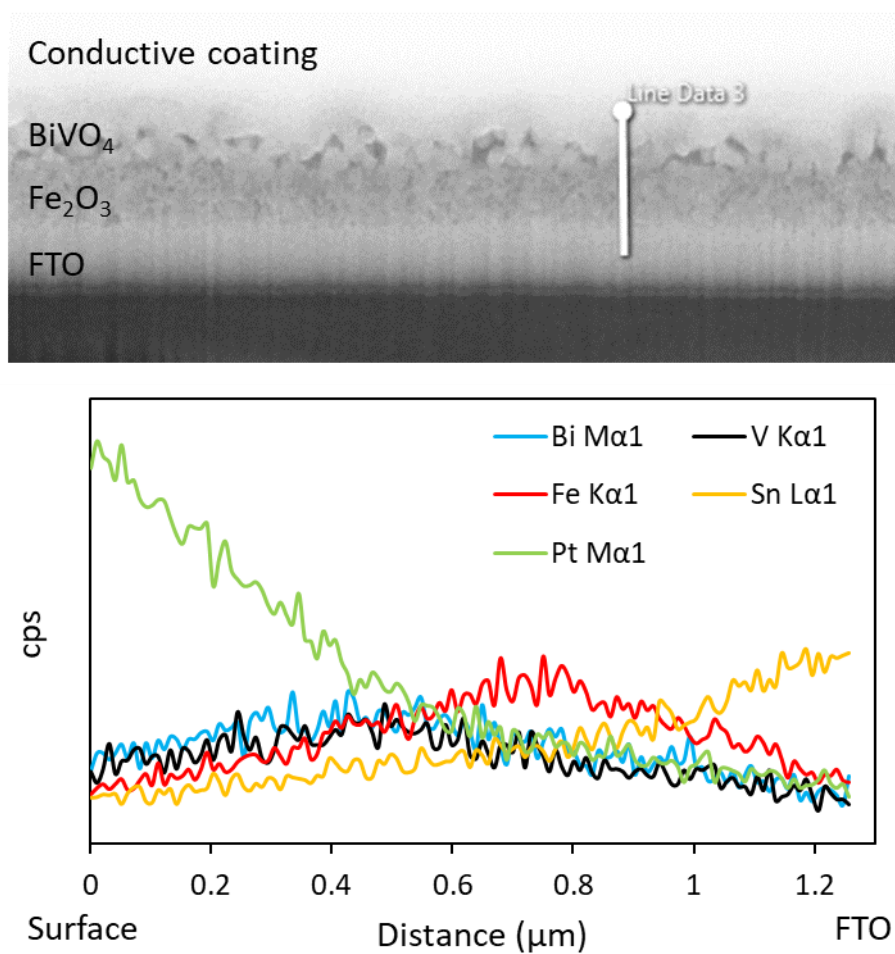

Fig. S7. EDS elemental line analysis of cross-sectional image of the FTO/Fe<sub>2</sub>O<sub>3</sub>/BiVO<sub>4</sub> film.

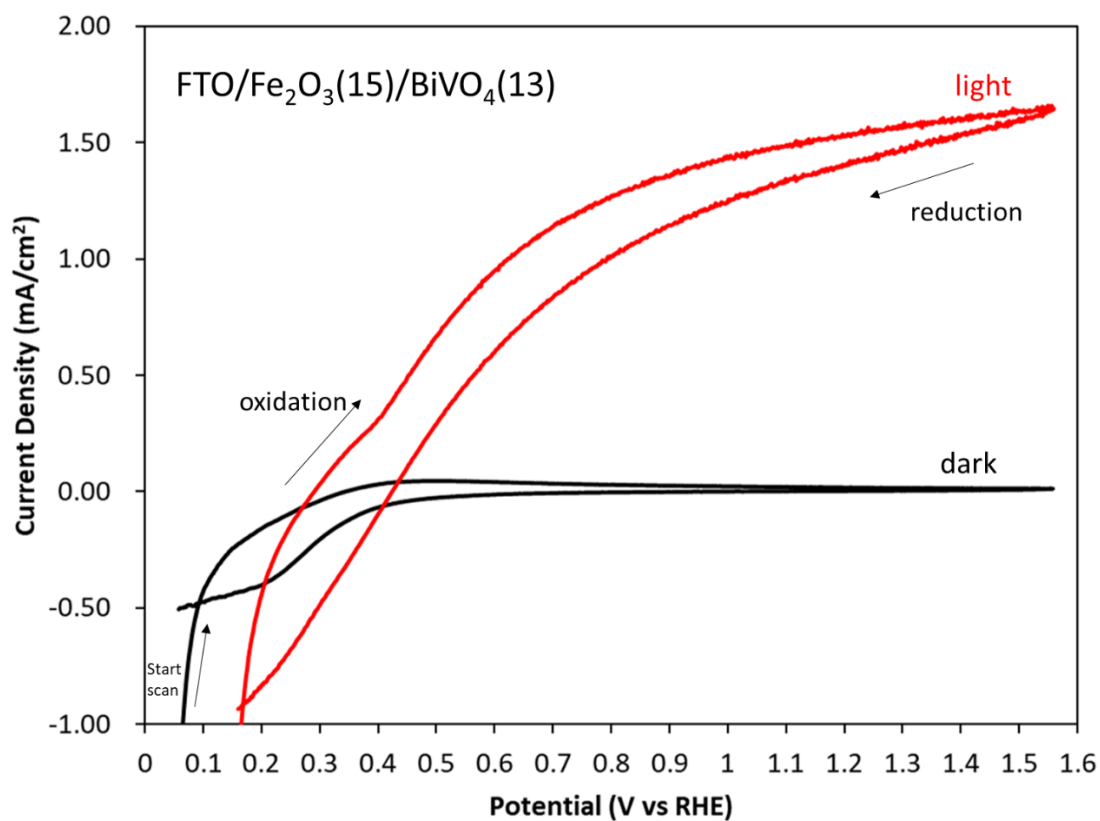

Fig. S8. CV curves of the FTO/Fe<sub>2</sub>O<sub>3</sub>(15)/BiVO<sub>4</sub>(13) anode. The light CV curve is collected in 0.5 M H<sub>3</sub>BO<sub>3</sub> adjusted to pH 9.5 with KOH under AM1.5G with 1 sun of front illumination. The scan rate was 20 mV/s.

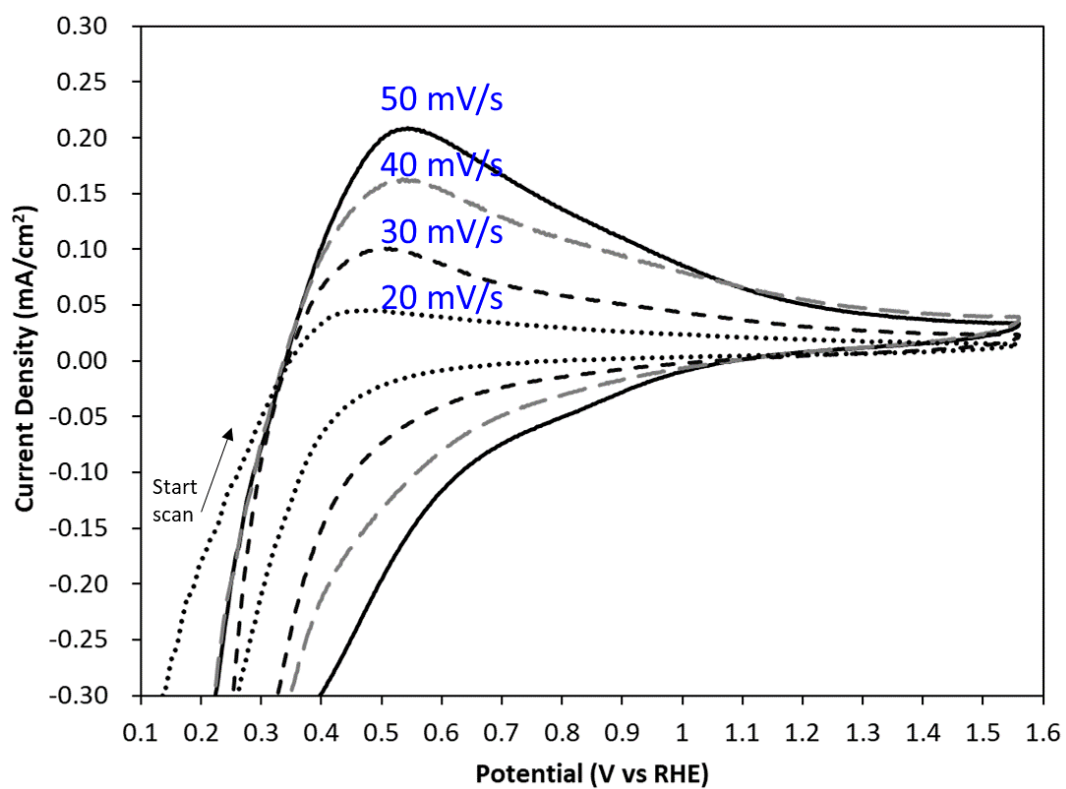

Fig. S9. Dark CV curves of the FTO/Fe<sub>2</sub>O<sub>3</sub>/BiVO<sub>4</sub> anode at different scan rates.

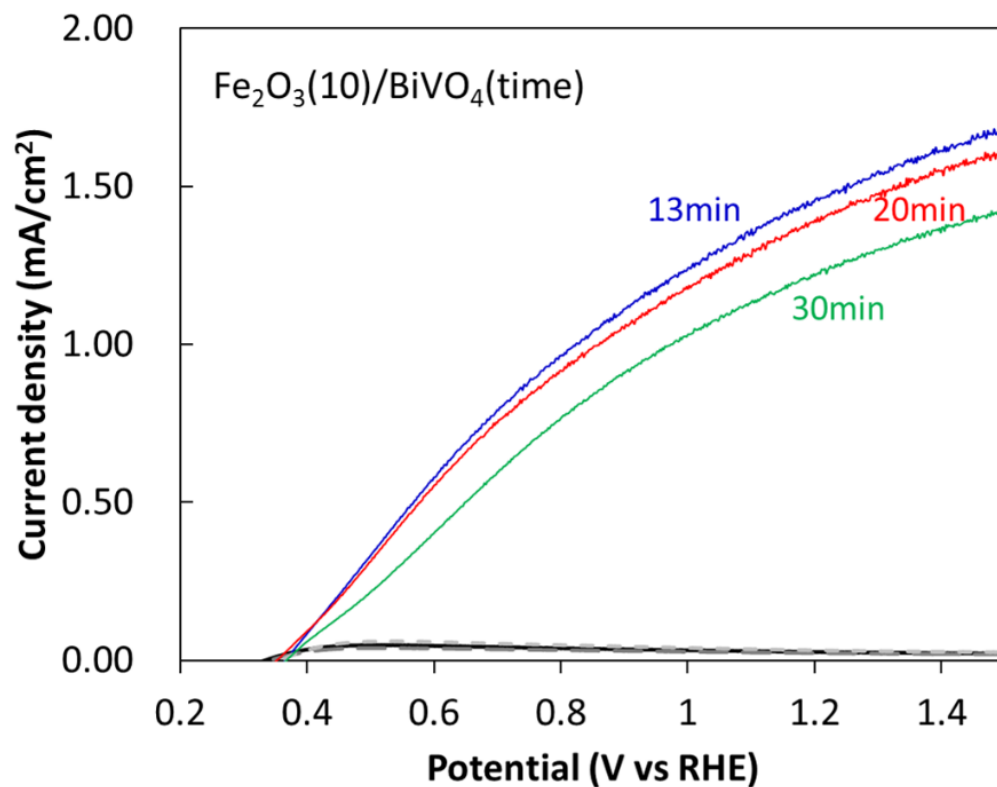

Fig. S10. PEC properties. J-V curves of the FTO/Fe<sub>2</sub>O<sub>3</sub>(**10**)/BiVO<sub>4</sub>(time) anode with deposition duration of the upper layer BiVO<sub>4</sub> for 13, 20 and 30 min. The deposit duration of the Fe<sub>2</sub>O<sub>3</sub> underlayer was **10 min**. Measurements were recorded under AM1.5G 1 sun light of front irradiation in a 0.5 M potassium borate (pH 9.5) solution.

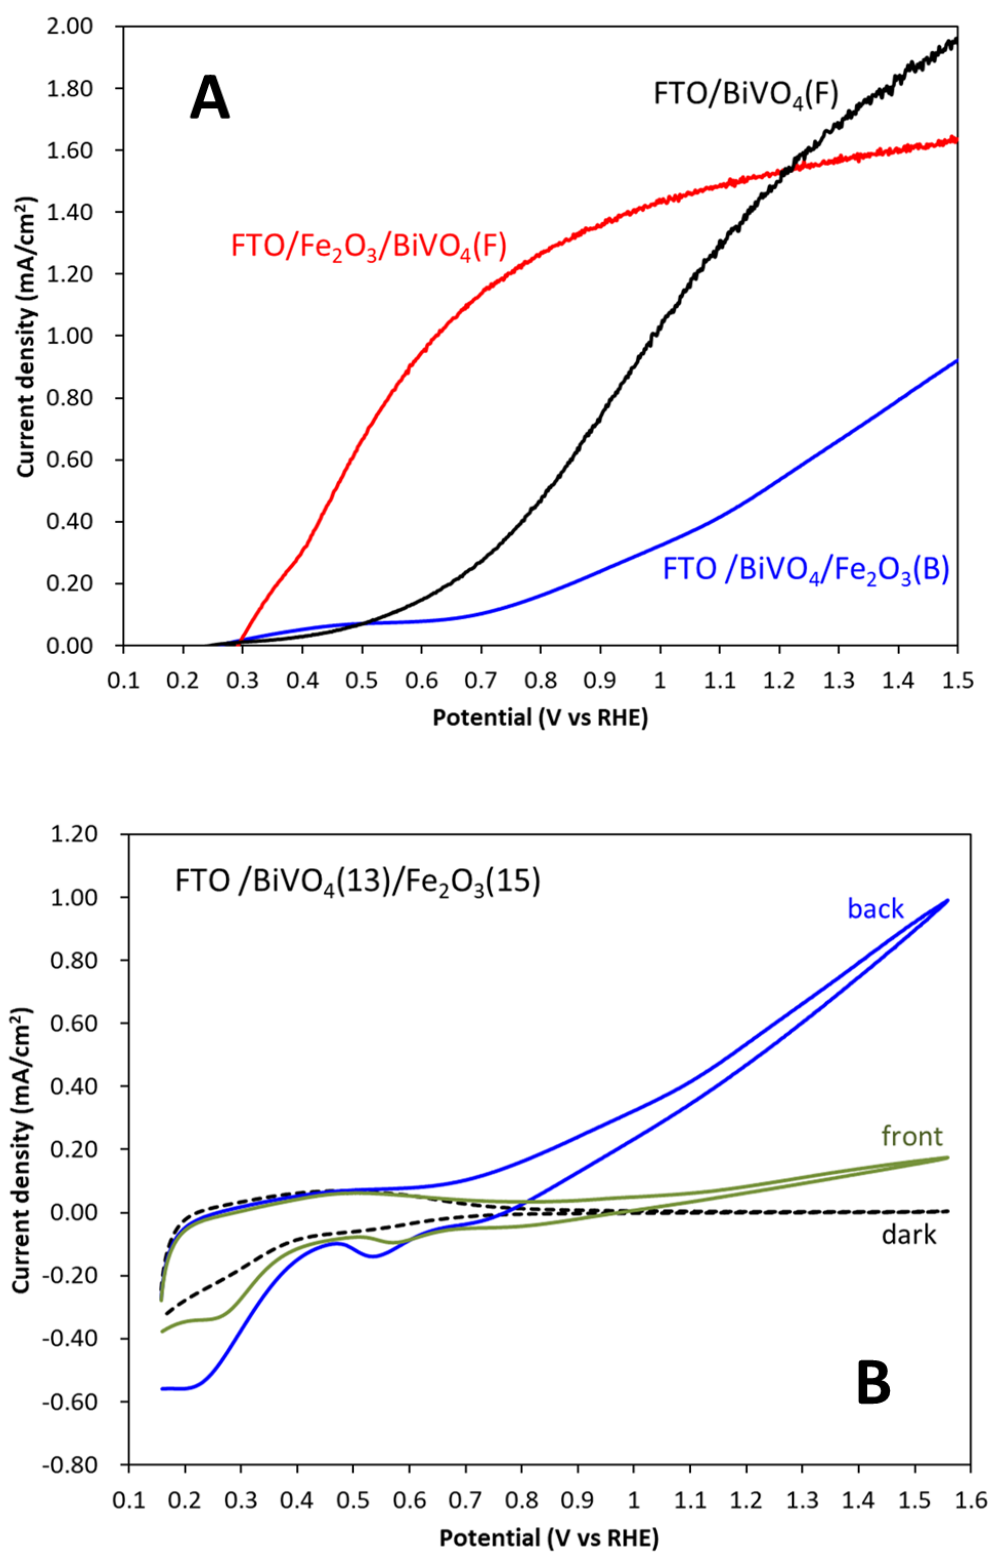

Fig. S11. (A) J-V curves of the FTO/BiVO<sub>4</sub>(13)/Fe<sub>2</sub>O<sub>3</sub>(15), FTO/BiVO<sub>4</sub> and FTO/Fe<sub>2</sub>O<sub>3</sub>(15)/BiVO<sub>4</sub>(13) anodes. (B) CV curves of the FTO/BiVO<sub>4</sub>(13)/Fe<sub>2</sub>O<sub>3</sub>(15) anode.

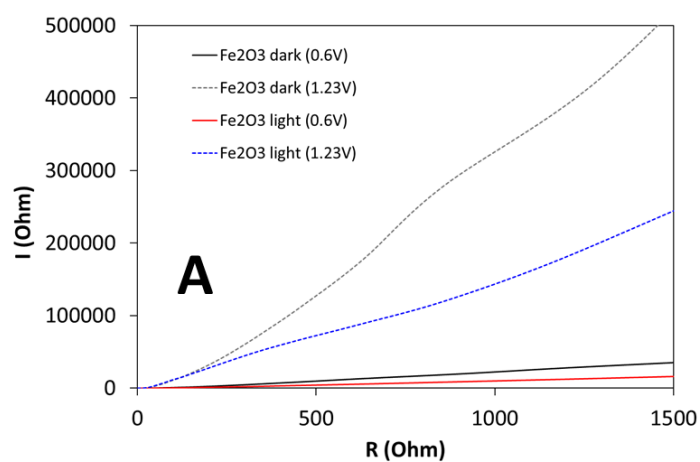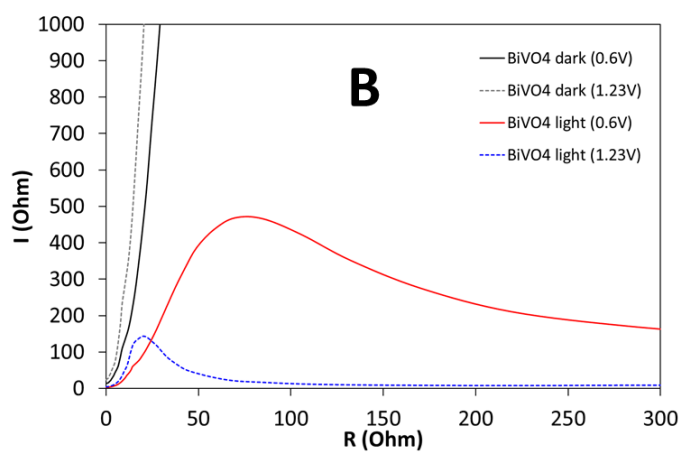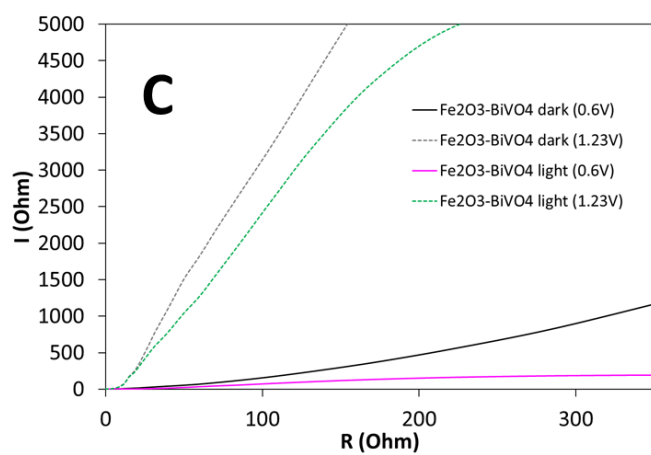

Fig. S12. Nyquist plots of (A) FTO/Fe<sub>2</sub>O<sub>3</sub>, (B) FTO/BiVO<sub>4</sub> and (C) FTO/Fe<sub>2</sub>O<sub>3</sub>/BiVO<sub>4</sub> anodes. Data were collected in the dark and under one sun light illumination at 0.6 V and 1.23 V vs. RHE from 10 kHz to 10 mHz.

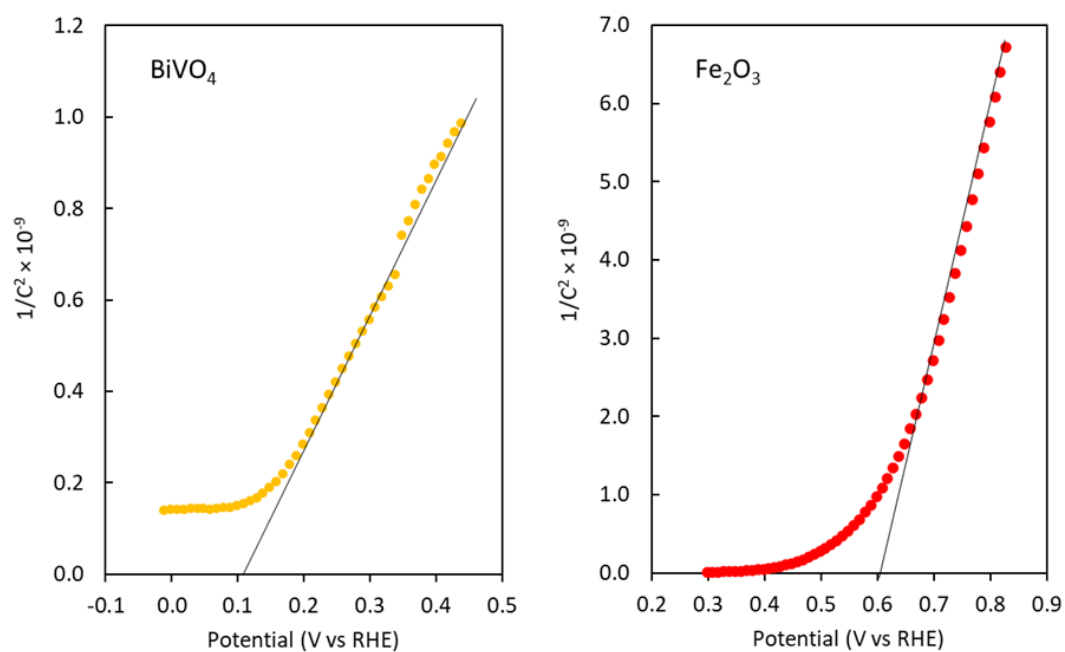

Fig. S13. Mott-Schottky plots for the FTO/ $\text{BiVO}_4$  and FTO/ $\text{Fe}_2\text{O}_3$  anodes measured in 0.5 M potassium borate (pH 9.5) solution at 1 kHz in the dark.
